# Supplementary material
Source: MDPI journal article supplement (https://www.mdpi.com/2073-445X/12/8/1587)
Supplement: s1 [file s1]

## Supplementary

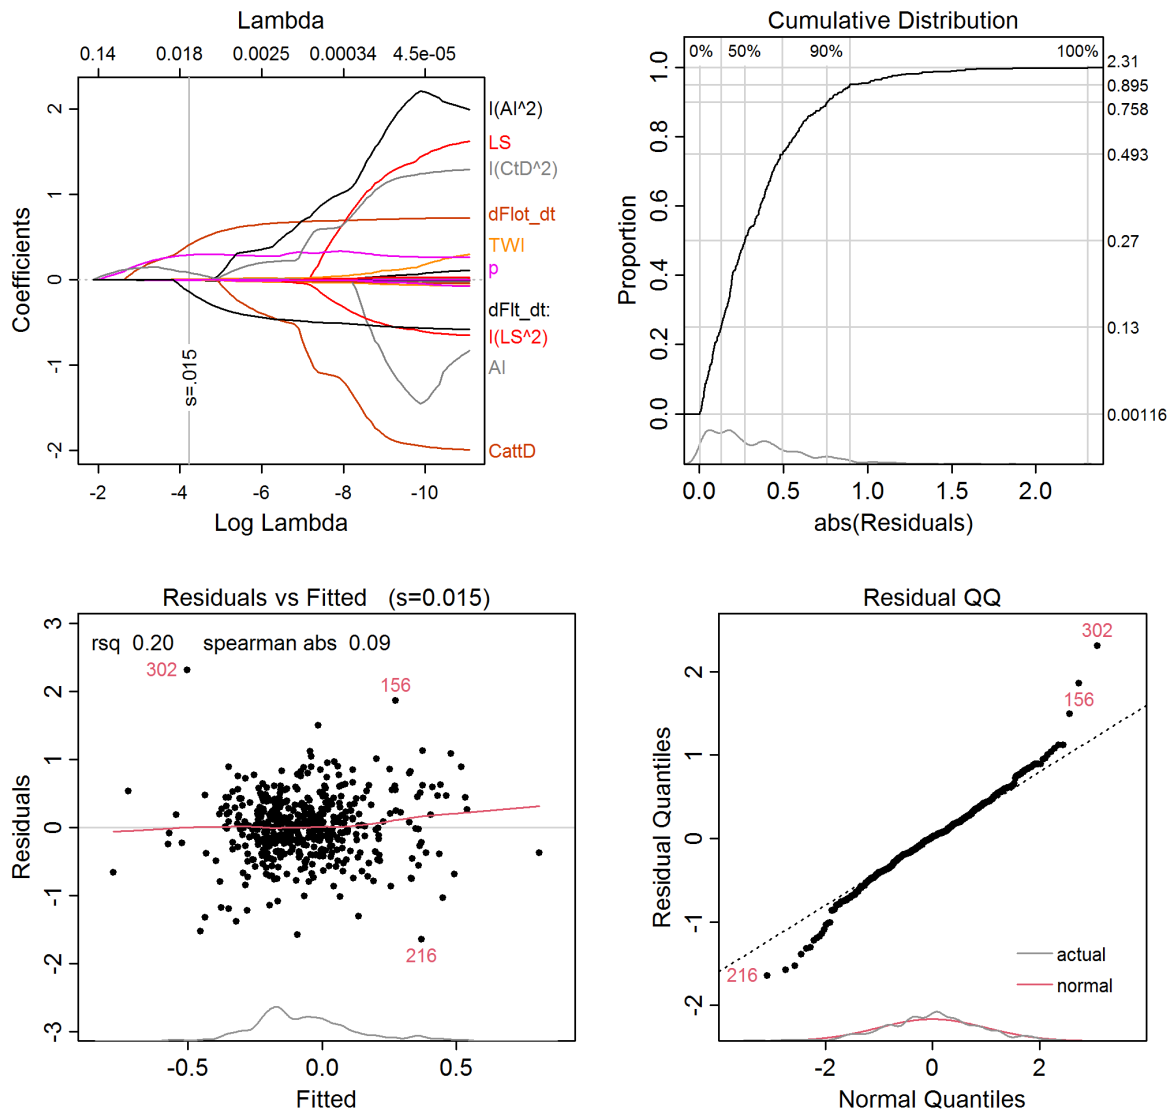

Figure S1. Diagnostic plots of LASSO regression.

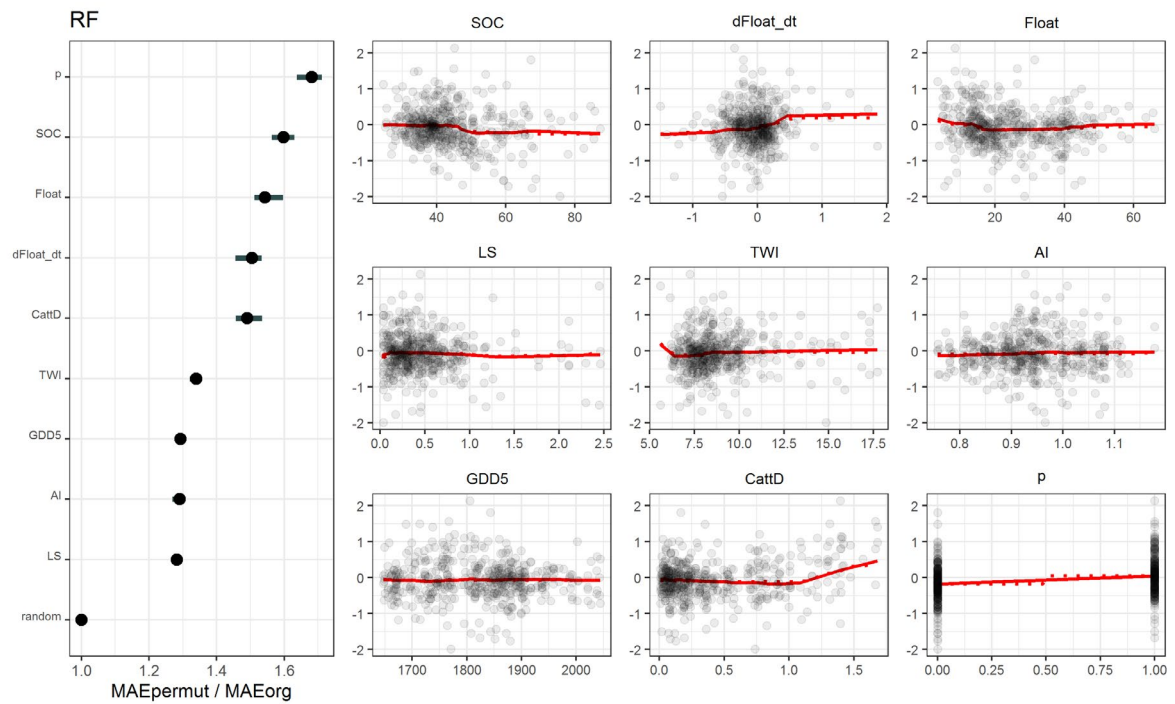

Figure S2. Permutation importance plot and partial dependence plots of RF model.

|             | <b>dSOC_dt</b>      | <b>dSOC_dt lasso</b> |
|-------------|---------------------|----------------------|
| (Intercept) | -36.637<br>(38.961) | -0.104               |
| SOC         | 0.837<br>(0.842)    | -0.004               |
| dFloat_dt   | 0.749***<br>(0.120) | 0.408                |
| Float       | -0.060<br>(0.030)   | 0                    |
| LS          | 1.957*<br>(0.764)   | 0                    |
| TWI         | 0.614<br>(0.397)    | 0.009                |
| AI          | 13.127<br>(30.087)  | 0                    |
| GDD5        | 0.028<br>(0.052)    | 0                    |
| CattD       | -2.270*<br>(1.090)  | 0                    |
| p           | 0.271<br>(0.198)    | 0.293                |
| LS^2        | -0.731*<br>(0.293)  | 0                    |
| TWI^2       | -0.023<br>(0.018)   | 0                    |
| AI^2        | -5.508<br>(15.966)  | 0                    |
| GDD5^2      | -0.000<br>(0.000)   | 0                    |
| Float^2     | 0.001               | 0                    |

|                | dSOC_dt   | dSOC_dt lasso |
|----------------|-----------|---------------|
|                | (0.001)   |               |
| CattD^2        | 1.420*    | 0.083         |
|                | (0.703)   |               |
| SOC * LS^2     | 0.019**   | 0             |
|                | (0.006)   |               |
| SOC * TWI^2    | 0.000     | 0             |
|                | (0.000)   |               |
| SOC * AI^2     | 0.177     | 0             |
|                | (0.340)   |               |
| SOC * GDD5^2   | 0.000     | 0             |
|                | (0.000)   |               |
| SOC * Float^2  | -0.000    | 0             |
|                | (0.000)   |               |
| SOC * CattD^2  | -0.019    | 0.002         |
|                | (0.016)   |               |
| SOC:LS         | -0.048**  | 0             |
|                | (0.017)   |               |
| SOC:TWI        | -0.013    | 0             |
|                | (0.009)   |               |
| SOC:AI         | -0.389    | -0.002        |
|                | (0.635)   |               |
| SOC:GDD5       | -0.001    | 0             |
|                | (0.001)   |               |
| SOC:Float      | 0.001     | 0             |
|                | (0.001)   |               |
| SOC:CattD      | 0.040     | 0             |
|                | (0.025)   |               |
| SOC:p          | -0.000    | 0             |
|                | (0.004)   |               |
| dFloat dt:p    | -0.617*** | -0.139        |
|                | (0.157)   |               |
| RMSE           | 0.448     |               |
| MAE            | 0.339     |               |
| R2             | 0.283     |               |
| RMSE_cv        | 1.533     |               |
| MAE_cv         | 0.909     |               |
| R2_cv          | -13.094   |               |
| zMoransI       | -0.64     |               |
| rvarSph_nugget | 0.064     |               |
| rvarSph_sill   | 0.015     |               |
| rvarSph_range  | 42604.7   |               |
| family         | gaussian  |               |
| link           | identity  |               |
| zeroinfl       | NULL      |               |
| overdisp       | NULL      |               |
| RMSElasso      | 0.474     |               |
| MAElasso       | 0.355     |               |
| R2lasso        | 0.196     |               |
| RMSElasso_cv   | 0.495     |               |
| MAElasso_cv    | 0.363     |               |
| R2lasso_cv     | 0.047     |               |
| RMSErf         | 0.213     |               |
| MAErf          | 0.157     |               |
| R2rf           | 0.838     |               |
| RMSErf_cv      | 0.492     |               |
| MAErf_cv       | 0.362     |               |

|                                     | <b>dSOC_dt dSOC_dt lasso</b> |
|-------------------------------------|------------------------------|
| R2rf_cv                             | 0.056                        |
| zMoransIrf                          | -1.07                        |
| Obs_Min                             | -1.98123                     |
| Obs_1Q                              | -0.36054                     |
| Obs_Median                          | -0.08035                     |
| Obs_Mean                            | -0.06691                     |
| Obs_3Q                              | 0.20159                      |
| Obs_Max                             | 2.13341                      |
| varSph_nugget                       | 0.276                        |
| varSph_sill                         | 0.102                        |
| varSph_range                        | 1279333                      |
| AIC                                 | 656.950                      |
| Num. obs.                           | 483                          |
| ***p < 0.001; **p < 0.01; *p < 0.05 |                              |

Table S1. Regression LASSO model results vs OLS regression.
